# Supplementary material
Source: HighWire-hosted journal article supplement (https://fg.bmj.com/content/13/6/471)
Supplement: inline-supplementary-material-1 [file inline-supplementary-material-1.pdf]

**Supplementary material: Survey questions and available responses.**

| <b>Question:</b> | <b>Question asked:</b>                                                                                                        | <b>Available responses:</b>                                                                      |
|------------------|-------------------------------------------------------------------------------------------------------------------------------|--------------------------------------------------------------------------------------------------|
| 1                | Do you have an MRI service for Crohn's disease?                                                                               | Yes or No                                                                                        |
| 2                | How often do you use it in your practice when clinically appropriate?                                                         | Always, Usually, Sometimes, Rarely, Never.                                                       |
| 3                | How many MRIs do you do for IBD per month in your hospital? (if unknown leave blank)?                                         | Free text                                                                                        |
| 4                | What is your typical waiting time (weeks) to get a result?                                                                    | Free text                                                                                        |
| 5                | How confident are you in your clinical decision making when using MRI data?                                                   | Extremely Confident, Very Confident, Somewhat confident, Not so confident, not at all confident. |
| 6                | Do you have a small bowel ultrasound (US) service for Crohn's disease?                                                        | Yes or No                                                                                        |
| 7                | How often do you use it in your practice when clinically appropriate?                                                         | Always, Usually, Sometimes, Rarely, Never.                                                       |
| 8                | How many US do you do for IBD per month in your hospital? (if unknown leave blank)?                                           | Free text                                                                                        |
| 9                | What is your typical waiting time (weeks) to get a result?                                                                    | Free text                                                                                        |
| 10               | How confident are you in your clinical decision making when using US data?                                                    | Extremely Confident, Very Confident, Somewhat confident, Not so confident, not at all confident. |
| 11               | If you do not have an US service would you be interested in developing one?                                                   | Yes or No                                                                                        |
| 12               | What is the name of the Trust that you work in?                                                                               | Dropdown box selection of Hospital or Healthcare trust of the UK.                                |
| 13               | Which region do you work in?                                                                                                  | Dropdown box selection of region of the UK.                                                      |
| 14               | If you wish to be contacted at a later date about small bowel US implementation research please enter your email address here | Free text                                                                                        |
